# Supplementary material
Source: PubMed Central journal article supplement (PMC7406258)
Supplement: jciinsight-5-137317-s031.pdf [file jciinsight-5-137317-s031.pdf]

## Supplement Figures

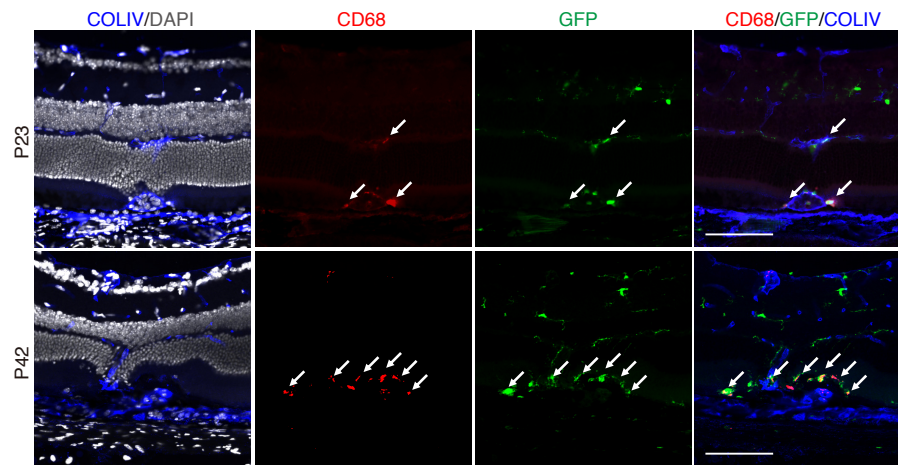

**Figure S1.** Neovascular tufts are surrounded by GFP-positive myeloid cells, many of which are activated in *Vldlr*<sup>-/-</sup> mice. Sectional immunohistochemistry for indicated antibodies in *Vldlr*<sup>-/-</sup>;*Cx3cr1*<sup>GFP/+</sup> mice. CD68, a marker for microglia activation, is expressed around neovascular tufts at P23, and became more intense at P42 (white arrows). Scale bars: 100  $\mu$ m.

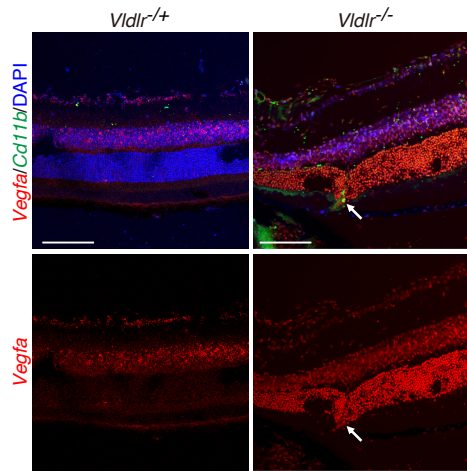

**Figure S2. *Vegfa* expression in outer nuclear layer is upregulated in *Vldlr*<sup>-/-</sup> mice.** In situ hybridization analysis of *Vegfa* and *Itgam* (*CD11b*) expression in the retinas of P23 *Vldlr*<sup>-/-</sup> and *Vldlr*<sup>+/+</sup> mice. White arrow indicates microglia migrated into outer retina. Scale bars: 100  $\mu$ m.

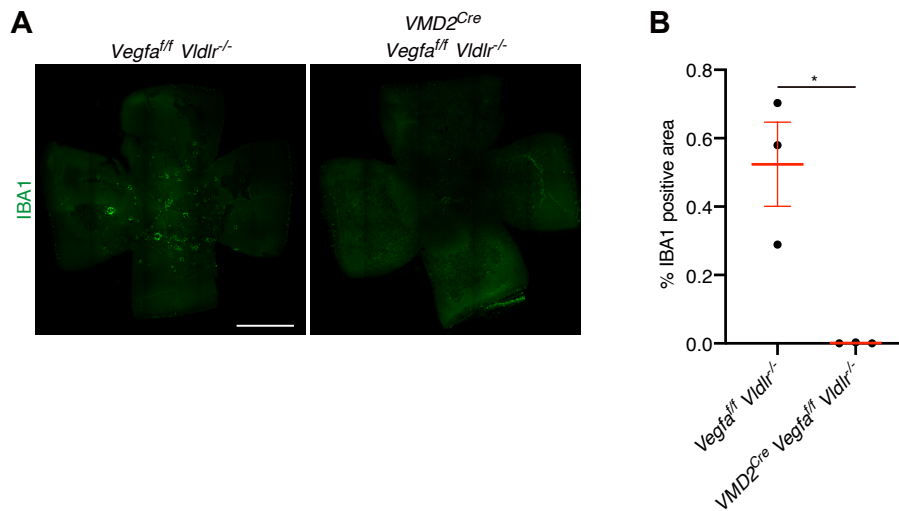

**Figure S3. IBA1 positive microglia are not localized in outer retina of RPE-specific *Vegfa* deleted *Vldlr*<sup>-/-</sup> mice.**

(A) The outer-retinal microglia at P23 were visualized by immunostaining with IBA1 antibody in *VMD2<sup>Cre</sup>; Vegfa<sup>ff</sup>; Vldlr<sup>-/-</sup>* mice and *Vegfa<sup>ff</sup>; Vldlr<sup>-/-</sup>* mice. Scale bars: 1 mm. (B) The percentage of IBA1 positive area were analyzed at P23 (n=3 each). The p-values were calculated using an unpaired two-tailed t-test. \*p < 0.05. Error bars indicate the mean ± standard error of the mean (SEM).
